# Supplementary material for: Robust and prototypical immune responses toward COVID-19 vaccine in First Nations peoples are impacted by comorbidities
Source: Springer Nature journal article supplement (doi:10.1038/s41590-023-01508-y), 2023-05-29
Supplement: MOESM1 [file 41590_2023_1508_MOESM1_ESM.pdf]

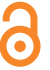

---

# **Robust and prototypical immune responses toward COVID-19 vaccine in First Nations peoples are impacted by comorbidities**

---

In the format provided by the authors and unedited

**Supplementary Table 1. Demographic and clinical information of COVAC participants**

|                          | Study ID | Age    | Gender     | Ethnicity                           | COVID vaccine | Comorbidities |
|--------------------------|----------|--------|------------|-------------------------------------|---------------|---------------|
| Australian First Nations | C013     | 48     | female     | Torres Strait Islander              | BNT162b2      | No            |
|                          | C018     | 21     | male       | Aboriginal                          | BNT162b2      | No            |
|                          | C020     | 62     | female     | Aboriginal                          | BNT162b2      | No            |
|                          | C022     | 23     | female     | Aboriginal                          | BNT162b2      | No            |
|                          | C023     | 31     | male       | Aboriginal                          | BNT162b2      | No            |
|                          | C025     | 44     | female     | South Sea Islander                  | BNT162b2      | No            |
|                          | C026     | 50     | male       | Aboriginal                          | BNT162b2      | Yes           |
|                          | C028     | 50     | female     | Aboriginal                          | BNT162b2      | No            |
|                          | C033     | 44     | female     | Aboriginal                          | BNT162b2      | No            |
|                          | C035     | 58     | female     | Aboriginal                          | BNT162b2      | Yes           |
|                          | C036     | 71     | female     | Aboriginal                          | BNT162b2      | Yes           |
|                          | C037     | 50     | male       | Aboriginal                          | BNT162b2      | Yes           |
|                          | C038     | 79     | female     | Aboriginal                          | BNT162b2      | Yes           |
|                          | C042     | 63     | female     | Aboriginal                          | BNT162b2      | Yes           |
|                          | C044     | 51     | female     | Aboriginal                          | BNT162b2      | Yes           |
|                          | C046     | 47     | male       | Aboriginal & Torres Strait Islander | BNT162b2      | No            |
|                          | C049     | 56     | female     | Aboriginal                          | BNT162b2      | Yes           |
|                          | C050     | 50     | female     | Aboriginal                          | BNT162b2      | Yes           |
|                          | C063     | 46     | male       | Aboriginal                          | BNT162b2      | Yes           |
|                          | C064     | 47     | male       | Aboriginal                          | BNT162b2      | Yes           |
|                          | C065     | 52     | female     | Aboriginal                          | BNT162b2      | Yes           |
|                          | C071     | 58     | male       | Aboriginal                          | BNT162b2      | Yes           |
|                          | C072     | 57     | male       | Aboriginal                          | BNT162b2      | Yes           |
|                          | C073     | 22     | male       | Aboriginal                          | BNT162b2      | No            |
|                          | C074     | 54     | female     | Aboriginal                          | BNT162b2      | Yes           |
|                          | C075     | 24     | male       | Aboriginal                          | BNT162b2      | No            |
|                          | C076     | 31     | male       | Aboriginal & Torres Strait Islander | BNT162b2      | No            |
|                          | C077     | 62     | male       | Aboriginal                          | BNT162b2      | No            |
|                          | C078     | 60     | male       | Aboriginal                          | BNT162b2      | No            |
|                          | C079     | 34     | male       | Aboriginal                          | BNT162b2      | No            |
|                          | C080     | 21     | female     | Aboriginal                          | BNT162b2      | No            |
|                          | C081     | 55     | male       | Aboriginal                          | BNT162b2      | Yes           |
|                          | C082     | 67     | male       | Aboriginal                          | BNT162b2      | Yes           |
|                          | C084     | 48     | female     | Aboriginal                          | BNT162b2      | No            |
|                          | C087     | 21     | male       | Aboriginal                          | BNT162b2      | No            |
|                          | C088     | 19     | female     | Aboriginal                          | BNT162b2      | No            |
|                          | C089     | 58     | male       | Aboriginal                          | BNT162b2      | No            |
|                          | C090     | 37     | female     | Aboriginal                          | BNT162b2      | No            |
|                          | C091     | 36     | male       | Aboriginal                          | BNT162b2      | No            |
|                          | C092     | 34     | male       | Aboriginal                          | BNT162b2      | No            |
|                          | C093     | 31     | male       | Aboriginal                          | BNT162b2      | No            |
| C094                     | 42       | female | Aboriginal | BNT162b2                            | No            |               |
| C095                     | 31       | female | Aboriginal | BNT162b2                            | No            |               |
| C096                     | 34       | female | Aboriginal | BNT162b2                            | No            |               |
| C097                     | 49       | male   | Aboriginal | BNT162b2                            | Yes           |               |
| C098                     | 30       | female | Aboriginal | BNT162b2                            | No            |               |
| C099                     | 37       | male   | Aboriginal | BNT162b2                            | Yes           |               |
| C100                     | 52       | female | Aboriginal | BNT162b2                            | No            |               |
| C101                     | 19       | male   | Aboriginal | BNT162b2                            | Yes           |               |
| C102                     | 39       | male   | Aboriginal | BNT162b2                            | No            |               |
| C103                     | 43       | female | Aboriginal | BNT162b2                            | No            |               |
| C104                     | 60       | female | Aboriginal | BNT162b2                            | Yes           |               |
| C105                     | 32       | male   | Aboriginal | BNT162b2                            | Unknown       |               |
| C106                     | 28       | female | Aboriginal | BNT162b2                            | No            |               |
| C107                     | 20       | male   | Aboriginal | BNT162b2                            | No            |               |
| C108                     | 24       | male   | Aboriginal | BNT162b2                            | No            |               |
| C109                     | 25       | male   | Aboriginal | BNT162b2                            | No            |               |
| C110                     | 21       | male   | Aboriginal | BNT162b2                            | No            |               |
| non-Indigenous           | C001     | 45     | female     | Caucasian                           | BNT162b2      | No            |
|                          | C002     | 62     | female     | Caucasian                           | BNT162b2      | No            |
|                          | C003     | 43     | female     | Caucasian                           | BNT162b2      | No            |
|                          | C004     | 48     | female     | Caucasian                           | BNT162b2      | No            |
|                          | C005     | 42     | female     | Caucasian                           | BNT162b2      | No            |
|                          | C006     | 59     | female     | Caucasian                           | BNT162b2      | No            |
|                          | C007     | 43     | female     | Caucasian                           | BNT162b2      | No            |
|                          | C008     | 59     | male       | Caucasian                           | BNT162b2      | No            |
|                          | C009     | 44     | female     | Caucasian                           | BNT162b2      | No            |
|                          | C010     | 43     | female     | Caucasian                           | BNT162b2      | No            |
|                          | C011     | 59     | female     | Caucasian                           | BNT162b2      | No            |
|                          | C012     | 27     | female     | Caucasian                           | BNT162b2      | No            |

|      |    |        |           |          |    |
|------|----|--------|-----------|----------|----|
| C014 | 45 | female | Caucasian | BNT162b2 | No |
| C015 | 30 | female | Caucasian | BNT162b2 | No |
| C016 | 56 | female | Caucasian | BNT162b2 | No |
| C017 | 57 | female | Caucasian | BNT162b2 | No |
| C019 | 36 | female | Caucasian | BNT162b2 | No |
| C021 | 43 | male   | Caucasian | BNT162b2 | No |
| C024 | 41 | female | Caucasian | BNT162b2 | No |
| C027 | 40 | female | Caucasian | BNT162b2 | No |
| C029 | 48 | female | Caucasian | BNT162b2 | No |
| C030 | 48 | male   | Caucasian | BNT162b2 | No |
| C031 | 39 | female | Caucasian | BNT162b2 | No |
| C032 | 30 | male   | Caucasian | BNT162b2 | No |
| C034 | 64 | male   | Caucasian | BNT162b2 | No |
| C041 | 41 | female | Asian     | BNT162b2 | No |
| C043 | 46 | female | Caucasian | BNT162b2 | No |
| C045 | 48 | male   | Caucasian | BNT162b2 | No |
| C048 | 23 | male   | Caucasian | BNT162b2 | No |
| C051 | 60 | female | Caucasian | BNT162b2 | No |
| C052 | 28 | female | Caucasian | BNT162b2 | No |
| C053 | 45 | male   | Caucasian | BNT162b2 | No |
| C054 | 39 | male   | Caucasian | BNT162b2 | No |
| C055 | 49 | male   | Asian     | BNT162b2 | No |
| C056 | 59 | female | Caucasian | BNT162b2 | No |
| C057 | 30 | female | Caucasian | BNT162b2 | No |
| C060 | 29 | female | Asian     | BNT162b2 | No |
| C067 | 49 | female | Caucasian | BNT162b2 | No |
| C068 | 29 | female | Caucasian | BNT162b2 | No |

---

**Supplementary Table 2. Demographic and clinical information of additional non-Indigenous cohorts with comorbidities**

| Study ID | Age | Gender | Ethnicity      | Renal disease | Diabetes     | Inflammatory Bowel Disease | COVID-19 vaccination |
|----------|-----|--------|----------------|---------------|--------------|----------------------------|----------------------|
| D01      | 44  | male   | Caucasian      | No            | Yes          | NA                         | No                   |
| D02      | 38  | female | Caucasian      | No            | Yes          | NA                         | No                   |
| D03      | 43  | male   | Caucasian      | Yes           | No           | NA                         | No                   |
| D04      | 44  | female | Caucasian      | Yes           | Yes          | NA                         | No                   |
| D05      | 55  | male   | Caucasian      | Yes           | Yes          | NA                         | No                   |
| D06      | 46  | female | Non-Indigenous | Yes           | No           | NA                         | No                   |
| D07      | 59  | male   | Caucasian      | Yes           | Yes          | NA                         | No                   |
| D08      | 61  | male   | Caucasian      | No            | Yes          | NA                         | No                   |
| D09      | 68  | male   | Caucasian      | Yes           | No           | NA                         | No                   |
| D10      | 65  | female | Caucasian      | No            | Yes          | NA                         | No                   |
| D11      | 53  | male   | Caucasian      | Yes           | No           | NA                         | No                   |
| D12      | 44  | male   | Caucasian      | Yes           | No           | NA                         | No                   |
| D13      | 73  | female | Caucasian      | Yes           | Yes          | NA                         | No                   |
| D14      | 68  | female | Caucasian      | No            | Yes          | NA                         | No                   |
| D15      | 39  | female | Non-Indigenous | Yes           | No           | NA                         | No                   |
| D16      | 72  | female | Caucasian      | No            | Yes          | NA                         | No                   |
| D17      | 63  | male   | Caucasian      | Yes           | No           | NA                         | ChAdOx1-S            |
| D18      | 47  | female | Caucasian      | Yes           | No           | NA                         | BNT162b2             |
| D19      | 58  | male   | Caucasian      | Yes           | No           | NA                         | BNT162b2             |
| D20      | 45  | male   | Caucasian      | Yes           | No           | NA                         | BNT162b2             |
| D21      | 58  | female | Caucasian      | Yes           | No           | NA                         | BNT162b2             |
| D22      | 53  | male   | Caucasian      | Yes           | Yes          | NA                         | BNT162b2             |
| D23      | 67  | male   | Caucasian      | Yes           | Yes          | NA                         | BNT162b2             |
| D24      | 65  | male   | Non-Indigenous | No            | Yes          | NA                         | ChAdOx1-S            |
| D25      | 61  | male   | Indian         | No            | Yes          | NA                         | ChAdOx1-S            |
| D26      | 70  | female | Non-Indigenous | No            | Yes          | NA                         | ChAdOx1-S            |
| D27      | 76  | female | Non-Indigenous | No            | pre-Diabetes | NA                         | BNT162b2             |
| D28      | 57  | male   | African        | No            | Yes          | NA                         | BNT162b2             |
| D29      | 73  | male   | Caucasian      | No            | Yes          | NA                         | BNT162b2             |
| D30      | 45  | male   | Caucasian      | No            | Yes          | NA                         | BNT162b2             |
| D31      | 69  | female | South Asian    | No            | Yes          | NA                         | ChAdOx1-S            |
| D32      | 57  | male   | Caucasian      | Yes           | Yes          | NA                         | ChAdOx1-S            |
| D33      | 62  | male   | Caucasian      | Yes           | No           | NA                         | ChAdOx1-S            |
| D34      | 62  | male   | Caucasian      | Yes           | No           | NA                         | ChAdOx1-S            |
| D35      | 27  | female | Caucasian      | No            | Yes          | NA                         | BNT162b2             |
| D36      | 57  | male   | Caucasian      | No            | Yes          | NA                         | ChAdOx1-S            |
| D37      | 58  | female | Caucasian      | No            | Yes          | NA                         | BNT162b2             |
| D38      | 62  | female | Caucasian      | No            | Yes          | NA                         | BNT162b2             |

---

|     |    |        |                |    |    |     |           |
|-----|----|--------|----------------|----|----|-----|-----------|
| I01 | 40 | female | Non-Indigenous | NA | NA | Yes | BNT162b2  |
| I02 | 49 | female | Non-Indigenous | NA | NA | Yes | BNT162b2  |
| I03 | 21 | male   | Non-Indigenous | NA | NA | Yes | BNT162b2  |
| I04 | 21 | male   | Non-Indigenous | NA | NA | Yes | BNT162b2  |
| I05 | 43 | male   | Non-Indigenous | NA | NA | Yes | BNT162b2  |
| I06 | 30 | male   | Non-Indigenous | NA | NA | Yes | BNT162b2  |
| I07 | 27 | male   | Non-Indigenous | NA | NA | Yes | BNT162b2  |
| I08 | 30 | male   | Non-Indigenous | NA | NA | Yes | BNT162b2  |
| I09 | 32 | male   | Non-Indigenous | NA | NA | Yes | BNT162b2  |
| I10 | 24 | male   | Non-Indigenous | NA | NA | Yes | BNT162b2  |
| I11 | 28 | female | Non-Indigenous | NA | NA | Yes | BNT162b2  |
| I12 | 26 | male   | Non-Indigenous | NA | NA | Yes | BNT162b2  |
| I13 | 29 | female | Non-Indigenous | NA | NA | Yes | BNT162b2  |
| I14 | 53 | female | Non-Indigenous | NA | NA | Yes | BNT162b2  |
| I15 | 32 | female | Non-Indigenous | NA | NA | Yes | BNT162b2  |
| I16 | 50 | female | Non-Indigenous | NA | NA | Yes | BNT162b2  |
| I17 | 25 | male   | Non-Indigenous | NA | NA | Yes | BNT162b2  |
| I18 | 54 | male   | Non-Indigenous | NA | NA | Yes | BNT162b2  |
| I19 | 25 | male   | Non-Indigenous | NA | NA | Yes | BNT162b2  |
| I20 | 30 | male   | Non-Indigenous | NA | NA | Yes | BNT162b2  |
| I21 | 54 | female | Non-Indigenous | NA | NA | Yes | BNT162b2  |
| I22 | 16 | male   | Non-Indigenous | NA | NA | Yes | BNT162b2  |
| I23 | 34 | female | Non-Indigenous | NA | NA | Yes | BNT162b2  |
| I24 | 33 | female | Non-Indigenous | NA | NA | Yes | BNT162b2  |
| I25 | 47 | female | Non-Indigenous | NA | NA | Yes | BNT162b2  |
| I26 | 22 | female | Non-Indigenous | NA | NA | Yes | BNT162b2  |
| I27 | 27 | female | Non-Indigenous | NA | NA | Yes | BNT162b2  |
| I28 | 36 | female | Non-Indigenous | NA | NA | Yes | BNT162b2  |
| I29 | 28 | male   | Non-Indigenous | NA | NA | Yes | BNT162b2  |
| I30 | 20 | female | Non-Indigenous | NA | NA | Yes | BNT162b2  |
| I31 | 64 | female | Non-Indigenous | NA | NA | Yes | ChAdOx1-S |

---

**Supplementary Table 3. HLA profile of Australian First Nations participants in the COVAC cohort**

| Study ID | HLA-A                 | HLA-B                 | HLA-C                 | HLA-DRB1               | HLA-DPB1              | HLA-DQB1                |
|----------|-----------------------|-----------------------|-----------------------|------------------------|-----------------------|-------------------------|
| C013     | 24:02:01,<br>32:01:01 | 44:02:01,<br>55:02:01 | 05:01:01,<br>08:01:01 | 04:04:01,<br>09:01:02  | 04:01:01,<br>05:01:01 | 03:02:01G,<br>03:03:02  |
| C018     | 02:01:01,<br>24:02:01 | 07:02:01,<br>56:02:01 | 01:02:01,<br>07:02:01 | 04:05:01,<br>15:01:01  | 04:01:01,<br>05:01:01 | 04:02:01, 06:02:01      |
| C020     | 01:01, 34:01          | 07:02, 15:21          | 04:03, 07:02          | 14:08, 15:01           | 04:01, 05:01          | 05:03, 06:02            |
| C023     | 01:01:01,<br>68:02:01 | 14:02:01,<br>18:01:01 | 07:01:01,<br>08:02:01 | 11:04:01,<br>13:03:01  | 02:01:02,<br>04:01:01 | 03:01:01G               |
| C025     | 03:01:01,<br>24:02:01 | 18:01:01,<br>57:01:01 | 06:02:01,<br>07:01:01 | 07:01:01,<br>15:02:01G | 02:01:02,<br>13:01:01 | 03:03:02,<br>06:01:01G  |
| C028     | 01:01:01,<br>02:01:01 | 08:01:01              | 07:01:01              | 03:01:01               | 01:01:01,<br>09:01:01 | 02:01:01G               |
| C033     | 34:01:01              | 40:02:01,<br>56:01:01 | 01:02:01,<br>07:02:01 | 08:03:02               | 02:01:02,<br>04:01:01 | 06:01:01G               |
| C037     | 34:01:01              | 13:01:01,<br>40:01:02 | 03:03:01,<br>04:01:01 | 08:03:02               | 02:01:02,<br>04:01:01 | 06:01:01G               |
| C038     | 01:01:01,<br>34:01:01 | 08:01:01,<br>13:01:01 | 04:01:01,<br>07:01:01 | 03:01:01,<br>08:03:02  | 04:01:01,<br>09:01:01 | 02:01:01G,<br>06:01:01G |
| C042     | 03:01:01,<br>34:01:01 | 07:02:01,<br>40:02:01 | 12:03:01,<br>15:02:01 | 07:01:01,<br>12:01:01G | 04:01:01,<br>05:01:01 | 03:01:01G,<br>03:03:02  |
| C044     | 11:01:01,<br>24:02:01 | 13:01:01, 15:06       | 04:01:94,<br>04:03:01 | 04:05:01,<br>08:03:02  | 04:01:01              | 03:01:01G,<br>06:01:01G |
| C046     | 02:01, 11:01          | 07:02, 15:21          | 04:03, 07:02          | 04:05, 15:01           | 04:01                 | 03:01, 06:02            |
| C049     | 33:03:01,<br>34:01:01 | 15:21:01,<br>58:01:01 | 03:02:02,<br>04:03:01 | 14:04:01, 14:09        | 04:01:01,<br>22:01:01 | 04:02:01, 05:03:01      |
| C050     | 02:01:01,<br>34:01:01 | 56:01:01,<br>56:02:01 | 01:02:01,<br>07:02:01 | 08:03:02               | 02:01:02,<br>05:01:01 | 06:01:01G               |
| C063     | 34:01:01              | 15:25:01,<br>56:01:01 | 01:02:01              | 04:05:01,<br>08:03:02  | 04:01:01,<br>05:01:01 | 04:01:01,<br>06:01:01G  |
| C065     | 11:01:01,<br>34:01:01 | 13:01:01              | 04:01:01              | 04:05:01,<br>08:03:02  | 02:01:02,<br>04:01:01 | 03:01:01G,<br>06:01:01G |
| C081     | 11:01:01,<br>34:01:01 | 40:01:02,<br>56:02:01 | 01:02:01,<br>03:03:01 | 08:03:02               | 02:01:02,<br>05:01:01 | 06:01:01G               |
| C082     | 34:01:01              | 40:02:01              | 15:02:01              | 08:03:02,<br>12:01:01G | 02:01:02              | 04:02:01,<br>06:01:01G  |
| C084     | 34:01:01              | 40:02:01              | 01:02:01,<br>15:02:01 | 14:08, 14:10           | 02:01:02,<br>652:01   | 04:02:01                |
| C085     | 11:01:01,<br>24:02:01 | 13:01:01,<br>44:02:01 | 04:01:94,<br>16:04:01 | 04:05:01,<br>11:04:01  | 04:01:01              | 03:01:01G               |
| C087     | 11:01:01,<br>24:02:01 | 13:01:01,<br>56:01:01 | 04:01:01,<br>07:02:01 | 12:01:01G, 14:08       | 02:01:02,<br>04:01:01 | 04:02:01, 05:03:01      |
| C088     | 02:01:01,<br>34:01:01 | 13:01:01,<br>56:01:01 | 04:01:01,<br>07:02:01 | 08:03:02               | 02:01:02,<br>04:01:01 | 06:01:01G               |
| C089     | 11:01:01              | 13:01:01              | 04:01:01,<br>04:01:94 | 04:05:01, 14:10        | 02:01:02,<br>05:01:01 | 03:01:01G,<br>04:02:01  |
| C090     | 11:01:01,<br>34:01:01 | 13:01:01              | 04:01:01              | 08:03:02,<br>14:54:01  | 02:01:02,<br>04:01:01 | 05:03:01,<br>06:01:NEW  |

---

|      |                       |                       |                       |                        |                       |                         |
|------|-----------------------|-----------------------|-----------------------|------------------------|-----------------------|-------------------------|
| C091 | 34:01:01              | 13:01:01              | 04:01:01              | 08:03:02               | 04:01:01              | 06:01:01G               |
| C092 | 11:01:01,<br>34:01:01 | 13:01:01,<br>56:01:01 | 04:01:01,<br>07:02:01 | 08:03:02,<br>12:01:01G | 02:01:02,<br>04:01:01 | 04:02:01,<br>06:01:01G  |
| C093 | 02:01:01,<br>34:01:01 | 40:01:02,<br>56:01:01 | 03:03:01,<br>07:02:01 | 08:03:02               | 02:01:02              | 05:03:01,<br>06:01:01G  |
| C094 | 11:01:01,<br>34:01:01 | 13:01:01              | 04:01:01              | 08:03:02, 14:08        | 04:01:01,<br>22:01:01 | 05:03:01,<br>06:01:01G  |
| C096 | 11:01:01,<br>34:01:01 | 13:01:01, 56:60       | 04:01:01              | 15:02:01G              | 04:01:01              | 06:01:01G               |
| C097 | 02:01:01,<br>24:02:01 | 13:01:01,<br>56:01:01 | 04:01:01,<br>07:02:01 | 04:05:01,<br>08:03:02  | 02:01:02              | 03:01:01G,<br>06:01:01G |
| C098 | 11:01:01              | 13:01:01              | 04:01:01,<br>04:01:94 | 04:05:01,<br>14:54:01  | 04:01:01              | 03:01:01G,<br>05:03:01  |
| C099 | 11:01:01,<br>34:01:01 | 13:01:01, 56:60       | 04:01:01              | 08:03:02,<br>15:02:01G | 02:01:02,<br>04:01:01 | 06:01:01G               |
| C100 | 11:01:01              | 13:01:01,<br>56:01:01 | 04:01:01              | 04:12, 08:03:02        | 02:01:02,<br>05:01:01 | 04:02:01,<br>06:01:01G  |

---

**Supplementary Table 4. Demographic, clinical and sampling information of Australian First Nations COVID-19 patients**

| Study ID | Age | Gender | Days post disease onset |    | Hospital admission | Hospital discharge | Comorbidities | COVID Vaccine brand | COVID Vaccine status | Treatments                                                                  | Days in hospital | ICU requirement | Oxygen supply |
|----------|-----|--------|-------------------------|----|--------------------|--------------------|---------------|---------------------|----------------------|-----------------------------------------------------------------------------|------------------|-----------------|---------------|
|          |     |        | V1                      | V2 |                    |                    |               |                     |                      |                                                                             |                  |                 |               |
| L02      | 33  | M      | 2                       |    | 0                  | 33                 | No            | BNT162b2            | 2 doses              | Budesonide Inhaler                                                          | 33               | Ward            | None          |
| L06      | 48  | M      | 3                       | 12 | 0                  | 16                 | Yes           | BNT162b2            | 2 doses              | Azithromycin, Baricitinib, Dexamethasone, Meropenum, Remdesivir, Vancomycin | 16               | ICU             | Non-invasive  |
| L09      | 68  | M      | 1                       | 8  | 1                  | 13                 | Yes           | BNT162b2            | 3 doses              | Dexamethasone, Remdesivir                                                   | 12               | Ward            | Non-invasive  |
| L10      | 55  | M      | 6                       | 11 | 4                  | 11                 | Yes           | BNT162b2            | 2 doses              | Budesonide Inhaler, Dexamethasone, Salbutamol                               | 7                | Ward            | Non-invasive  |
| L11      | 69  | F      | 8                       | 11 | 0                  | 17                 | Yes           | BNT162b2            | 2 doses              | Augmentin, Ceftriaxone, Doxycycline, Prednisolone                           | 17               | Ward            | None          |
| L12      | 66  | F      | 4                       | 9  | 0                  | 11                 | Yes           | BNT162b2            | 3 doses              | Dexamethasone, Remdesivir                                                   | 11               | Ward            | Non-invasive  |









|            |        |                    |                   |         |       |                  |   |   |   |
|------------|--------|--------------------|-------------------|---------|-------|------------------|---|---|---|
| TRAV9-2    | TRAJ17 | CALSVFQIKAAGNKLTF  | TRBV20-1          | TRBJ2-2 | NA    | CSARDLFSQNTGELFF | 1 |   |   |
| TRAV12-3   | TRAJ24 | CAMSCDSWGKLQF      | TRBV13            | TRBJ2-5 | TRBD1 | CASSHGTTGQETQYF  |   | 1 |   |
| TRAV35     | TRAJ30 | CAGVRDDKIIF        | TRBV27            | TRBJ2-7 | TRBD2 | GSSYEQYF         |   | 1 |   |
| ND         | ND     | ND                 | TRBV30            | TRBJ2-2 | TRBD1 | CAWSPPALGNTGELFF |   | 1 |   |
| TRAV9-2    | TRAJ58 | CALSIWGETSGSRLTF   | TRBV12-3/TRBV12-4 | TRBJ2-2 | TRBD1 | CATQSENTGELFF    |   |   | 3 |
| ND         | ND     | ND                 | TRBV7-8           | TRBJ2-2 | TRBD2 | CATGELDTGELFF    |   |   | 1 |
| ND         | ND     | ND                 | TRBV12-3/TRBV12-4 | TRBJ2-2 | TRBD1 | CAGQTANTGELFF    |   |   | 1 |
| ND         | ND     | ND                 | TRBV15            | TRBJ2-2 | TRBD1 | CAVQILNTGELFF    |   |   | 1 |
| ND         | ND     | ND                 | TRBV19            | TRBJ2-2 | TRBD1 | CATQDLNTGELFF    |   |   | 1 |
| TRAV17     | TRAJ36 | CATDPGTGANNLFF     | TRBV7-9           | TRBJ2-7 | TRBD1 | CASSPDIEQYF      |   |   | 1 |
| TRAV20     | TRAJ32 | CAVDYGGATNKLIF     | TRBV13            | TRBJ1-4 | TRBD1 | CASSLQTEKLFF     |   |   | 1 |
| TRAV38-1   | TRAJ24 | CAQHKTDSWGKLQF     | TRBV5-1           | TRBJ2-2 | TRBD2 | CASGDSNTGELFF    |   |   | 1 |
| TRAV5      | TRAJ26 | CAEDHGQNFVF        | ND                | ND      | ND    | ND               |   |   | 1 |
| TRAV27     | TRAJ42 | CAGASHMNYGGSQGNLIF | TRBV2             | TRBJ2-2 | NA    | CASMVSLNTGELFF   |   |   | 3 |
| ND         | ND     | ND                 | TRBV20-1          | TRBJ2-2 | TRBD1 | CSARPPDAMNTGELFF |   |   | 2 |
| ND         | ND     | ND                 | TRBV7-9           | TRBJ1-1 | TRBD2 | CASSPEIEAFF      |   |   | 2 |
| ND         | ND     | ND                 | TRBV7-9           | TRBJ2-2 | TRBD1 | CARSDPNTGELFF    |   |   | 2 |
| TRAV13-1   | TRAJ43 | CAAKEYNNNDMRF      | ND                | ND      | ND    | ND               |   |   | 2 |
| TRAV19     | TRAJ36 | CALSYTGANNLFF      | TRBV20-1          | TRBJ2-2 | TRBD1 | CSARDDRATNTGELFF |   |   | 2 |
| TRAV23/DV6 | TRAJ48 | ANFGNEKLTF         | TRBV7-8           | TRBJ2-7 | TRBD1 | CASSSGNEQYF      |   |   | 2 |
| TRAV8-3    | TRAJ33 | CAVIMDSNYQLIW      | TRBV11-1          | TRBJ2-2 | TRBD1 | CAILFDRNTGELFF   |   |   | 2 |
| ND         | ND     | ND                 | TRBV12-3/TRBV12-4 | TRBJ2-2 | TRBD2 | CAAGSLNTGELFF    |   |   | 1 |
| ND         | ND     | ND                 | TRBV2             | TRBJ2-2 | TRBD1 | CAGNDQNTGELFF    |   |   | 1 |
| ND         | ND     | ND                 | TRBV20-1          | TRBJ2-2 | TRBD1 | CSARDDRATNTGELFF |   |   | 1 |
| ND         | ND     | ND                 | TRBV3-1/TRBV3-2   | TRBJ2-2 | TRBD1 | CASQYANTGELFF    |   |   | 1 |
| ND         | ND     | ND                 | TRBV7-8           | TRBJ2-2 | NA    | CARENQNTGELFF    |   |   | 1 |
| ND         | ND     | ND                 | TRBV7-9           | TRBJ2-1 | TRBD1 | CASSPDIEQFF      |   |   | 1 |
| ND         | ND     | ND                 | TRBV7-9           | TRBJ2-7 | TRBD1 | CASSPDIEQYF      |   |   | 1 |
| ND         | ND     | ND                 | TRBV7-9           | TRBJ2-7 | TRBD1 | CASSPDISGYF      |   |   | 1 |
| TRAV20     | TRAJ15 | CASGNQAGTALIF      | TRBV28            | TRBJ2-1 | TRBD2 | CATGLLSNEQFF     |   |   | 1 |
| TRAV27     | TRAJ13 | CADPNAGNNHIQNP     | TRBV5-6           | TRBJ2-2 | TRBD1 | CAVGLDNTGELFF    |   |   | 1 |
| TRAV27     | TRAJ38 | CADPNAGNNRKLIV     | TRBV5-6           | TRBJ2-2 | TRBD1 | CAVGLDNTGELFF    |   |   | 1 |



|            |        |                   |                 |         |       |                     |   |   |   |   |   |   |   |   |   |   |   |  |  |   |
|------------|--------|-------------------|-----------------|---------|-------|---------------------|---|---|---|---|---|---|---|---|---|---|---|--|--|---|
| TRAV9-2    | TRAJ42 | CALARGGSQGNLIF    | TRBV20-1        | TRBJ2-7 | TRBD1 | CSARDLRTGGHYEQYF    | 1 |   |   |   |   |   |   |   |   |   |   |  |  |   |
| ND         | ND     | ND                | TRBV11-2        | TRBJ2-7 | TRBD2 | CASSFFTNEQYF        |   | 1 |   |   |   |   |   |   |   |   |   |  |  |   |
| ND         | ND     | ND                | TRBV20-1        | TRBJ1-1 | TRBD1 | CSARDLGNTAEFF       |   | 1 |   |   |   |   |   |   |   |   |   |  |  |   |
| TRAV16     | TRAJ28 | CALSVPGAGSYQLTF   | TRBV28          | TRBJ1-1 | TRBD1 | CASSLNVGYKAFF       |   | 1 |   |   |   |   |   |   |   |   |   |  |  |   |
| TRAV40     | TRAJ53 | CLLLTRGSGGSNYKLTF | TRBV12-5        | TRBJ2-7 | TRBD1 | CASGLSASLGFPYEQYF   |   | 1 |   |   |   |   |   |   |   |   |   |  |  |   |
| ND         | ND     | ND                | TRBV20-1        | TRBJ2-7 | TRBD2 | CSARGLGAYEQYF       |   |   | 1 |   |   |   |   |   |   |   |   |  |  |   |
| ND         | ND     | ND                | TRBV7-9         | TRBJ2-1 | TRBD1 | CASSALGQQTSYNEQFF   |   |   | 1 |   |   |   |   |   |   |   |   |  |  |   |
| TRAV17     | TRAJ32 | CATDRRGGATNKLIF   | TRBV24-1        | TRBJ2-1 | TRBD1 | CATSVGGGATYEQFF     |   |   | 1 |   |   |   |   |   |   |   |   |  |  |   |
| TRAV38-1   | TRAJ7  | CACLIYGNRLAF      | TRBV7-2         | TRBJ1-5 | TRBD1 | CASSLDRSNQPQHF      |   |   | 1 |   |   |   |   |   |   |   |   |  |  |   |
| TRAV4      | TRAJ26 | CLVGPFPRDNYQNFVF  | TRBV13          | TRBJ2-5 | TRBD1 | CASSPPDRGEQETQYF    |   |   | 1 |   |   |   |   |   |   |   |   |  |  |   |
| ND         | ND     | ND                | TRBV15          | TRBJ2-1 | TRBD1 | CATSRDQGNQFF        |   |   |   | 1 |   |   |   |   |   |   |   |  |  |   |
| ND         | ND     | ND                | TRBV20-1        | TRBJ2-3 | TRBD2 | CSARDSNTDTQYF       |   |   |   |   | 1 |   |   |   |   |   |   |  |  |   |
| ND         | ND     | ND                | TRBV20-1        | TRBJ2-7 | TRBD1 | CSARVGGGGHYEQYF     |   |   |   |   | 1 |   |   |   |   |   |   |  |  |   |
| TRAV13-2   | TRAJ58 | EETSGSRLTF        | TRBV20-1        | TRBJ2-7 | TRBD1 | CSARVGGGGHYEQYF     |   |   |   |   | 1 |   |   |   |   |   |   |  |  |   |
| TRAV21     | TRAJ22 | CAVFSSGSARQLTF    | TRBV20-1        | TRBJ2-4 | TRBD1 | CSATKDRWDIQYF       |   |   |   |   | 1 |   |   |   |   |   |   |  |  |   |
| TRAV29/DV5 | TRAJ28 | CAASPYSGAGSYQLTF  | TRBV5-6         | TRBJ1-2 | TRBD1 | CASSLGRGQRYTF       |   |   |   |   | 1 |   |   |   |   |   |   |  |  |   |
| TRAV4      | TRAJ37 | CLVGDPHGSSTGKLIF  | TRBV27          | TRBJ2-1 | TRBD2 | CASSSRLAGQSYNEQFF   |   |   |   |   | 1 |   |   |   |   |   |   |  |  |   |
| ND         | ND     | ND                | TRBV20-1        | TRBJ2-7 | TRBD1 | CSARLNSAASVEQYF     |   |   |   |   |   | 1 |   |   |   |   |   |  |  |   |
| ND         | ND     | ND                | TRBV4-1         | TRBJ2-7 | TRBD2 | CASSQDSGGYYEQYF     |   |   |   |   |   | 1 |   |   |   |   |   |  |  |   |
| ND         | ND     | ND                | TRBV7-8         | TRBJ2-3 | TRBD1 | CASSLVQGVTDQYF      |   |   |   |   |   | 1 |   |   |   |   |   |  |  |   |
| ND         | ND     | ND                | TRBV10-1        | TRBJ2-1 | TRBD1 | CASSEEGGSDEQFF      |   |   |   |   |   |   | 1 |   |   |   |   |  |  |   |
| ND         | ND     | ND                | TRBV20-1        | TRBJ2-1 | TRBD2 | CSARDRGLAGVEQFF     |   |   |   |   |   |   | 1 |   |   |   |   |  |  |   |
| TRAV16     | TRAJ26 | CALDNYGQNFVF      | TRBV5-6         | TRBJ2-7 | TRBD1 | CASRPQGLYEQYF       |   |   |   |   |   |   |   | 1 |   |   |   |  |  |   |
| ND         | ND     | ND                | TRBV20-1        | TRBJ1-4 | TRBD1 | CSAVTIEGQRNEKLFF    |   |   |   |   |   |   |   |   |   |   |   |  |  | 1 |
| ND         | ND     | ND                | TRBV27          | TRBJ2-3 | TRBD2 | CASSLVAGGTDQYF      |   |   |   |   |   |   |   |   |   |   |   |  |  | 1 |
| TRAV29/DV5 | TRAJ26 | CAARRDNYGQNFVF    | ND              | ND      | ND    | ND                  |   |   |   |   |   |   |   |   |   |   |   |  |  | 3 |
| TRAV16     | TRAJ33 | CALSGIGDSNYQLIW   | TRBV5-6         | TRBJ2-7 | TRBD1 | CASSLAGSFYEQYF      |   |   |   |   |   |   |   |   |   |   |   |  |  | 1 |
| TRAV4      | TRAJ42 | CLAVDGGSQGNLIF    | TRBV20-1        | TRBJ2-7 | TRBD2 | CSARVLLTSGRLGINEQYF |   |   |   |   |   |   |   |   |   |   |   |  |  | 1 |
| TRAV41     | TRAJ34 | CAVRKYNTDKLIF     | TRBV6-1         | TRBJ2-7 | TRBD1 | CASSERGRGVLYEQYF    |   |   |   |   |   |   |   |   |   |   |   |  |  | 1 |
| ND         | ND     | ND                | TRBV6-2/TRBV6-3 | TRBJ2-4 | TRBD1 | CASSYSQREWGNIQYF    |   |   |   |   |   |   |   |   |   |   |   |  |  | 1 |
| TRAV24     | TRAJ53 | CAPRSGGSNYKLTF    | ND              | ND      | ND    | ND                  |   |   |   |   |   |   |   |   |   |   |   |  |  | 1 |
| Total      |        |                   |                 |         |       |                     | 1 | 1 | 4 | 5 | 1 | 6 | 3 | 3 | 2 | 6 | 3 |  |  |   |

**Supplementary Table 6. Primers of Multiplex-nested RT-PCR**

| <b>TRAV External</b> | <b>TRAV External Sequence</b>                  | <b>TRBV External</b>   | <b>TRBV External Sequence</b>                   | <b>TRAV Internal</b> | <b>TRAV Internal Sequence</b>                     | <b>TRBV Internal</b>   | <b>TRBV Internal Sequence</b>                         |
|----------------------|------------------------------------------------|------------------------|-------------------------------------------------|----------------------|---------------------------------------------------|------------------------|-------------------------------------------------------|
| huTRAV1ext<br>t      | AACTGCACGTACCAGACAT<br>C                       | huTRBV2ext             | TCGATGATCAATTCTCAGT<br>TG                       | huTRAV1in<br>t       | GCACCCACATTTCTKTCTTA<br>C                         | huTRBV2int             | TTCACCTGAAGATCCGG<br>TC                               |
| huTRAV2ext<br>t      | GATGTGCACCAAGACTCC                             | huTRBV3ext             | CAAAATACCTGGTCACACA<br>G                        | huTRAV2in<br>t       | CACTCTGTGTCCAATGCTTA<br>C                         | huTRBV3int             | AATCTTCACATCAATTCCC<br>TG                             |
| huTRAV3ext<br>t      | AAGATCAGGTCAACGTTG<br>C                        | huTRBV4ext             | TCGCTTCTCACCTGAATG                              | huTRAV3in<br>t       | ATGCACCTATTCAGTCTCTG<br>G                         | huTRBV4int             | CCTGCAGCCAGAAGACTC                                    |
| huTRAV4ext<br>t      | CTCCATGGACTCATATGAA<br>GG                      | huTRBV5-<br>1_4ext     | GATTCTCAGGKCKCCAGTT<br>C                        | huTRAV4in<br>t       | ATTATATCACGTGGTACCAA<br>CAG                       | huTRBV5-<br>1_4int     | CTTGAGCTGGRSACTC                                      |
| huTRAV5ext<br>t      | CTTTTCTGAGTGTCCGAG                             | huTRBV5-<br>5_8ext     | GTACCAACAGGYCCTGGG<br>T                         | huTRAV5in<br>t       | TACACAGACAGCTCCTCCA<br>C                          | huTRBV5-<br>5_8int     | TCTGAGCTGAATGTGAAC<br>G                               |
| huTRAV6ext<br>t      | CACCTGACCTGCAACTAT<br>AC                       | huTRBV6-<br>1_3,5_9ext | ACTCAGACCCCAAAATTCC<br>ACTGGCAAAGGAGAAGTC<br>C  | huTRAV6in<br>t       | TGGTACCGACAAGATCCAG<br>TATGAGAAGCAGAAAGGAA<br>GAC | huTRBV6-<br>1_3,5_9int | GTGTRCCCAGGATATGAA<br>CC<br>TGTTTATAGTGTCTCCAG<br>AGC |
| huTRAV7ext<br>t      | GCAAAATACAGGGATGGG                             | huTRBV6-4ext           | TRTGATCCAATTCAGGTC                              | huTRAV7in<br>t       | GTCAACACCTTCAGCTTCTC                              | huTRBV6-4int           | TCYACTCTGAMGWTTCCA<br>GCG                             |
| huTRAV8-<br>1ext     | CTCACTGGAGTTGGGATG                             | huTRBV7-<br>1_3ext     | CGSWTCTYTGAGARAGG                               | huTRAV8-<br>1int     | TTTGAGGCTGAATTTAAGAG<br>G                         | huTRBV7-<br>1_3int     | TGRMGATYCAGCGCACA<br>GTACCAACAGAGCCTGGA<br>C          |
| huTRAV8-<br>3ext     | CACTGTCTCTGAAGGAGC<br>C                        | huTRBV7-<br>4_9ext     | GATCACAGCAACTGGACA<br>G                         | huTRAV8-<br>3int     | AGAGTGAAACCTCCTTCCA<br>C                          | huTRBV7-<br>4_9int     | TGGTATCGACAAGACCTG<br>G                               |
| huTRAV8-<br>2,4ext   | GCCACCCTGGTTAAAGG                              | huTRBV9ext             | CAGAGCCCAAGACACAAG                              | huTRAV8-<br>2,4int   | AACCAAGGACTCCAGCTTC                               | huTRBV9int             | GGAACACCAGTGAAGTCTG<br>AG                             |
| huTRAV8-<br>6ext     | GAGCTGAGGTGCAACTAC<br>TC                       | huTRBV10-<br>1ext      | ACCTTGATGTGTCACCAGA<br>C                        | huTRAV8-<br>6int     | ATCAGAGGTTTTGAGGCTG<br>GAAACCACTTCTTTCCACTT<br>G  | huTRBV10-<br>1int      | GACTCCACTCTCAAGATC<br>CA                              |
| huTRAV8-<br>7ext     | CTAACAGAGGCCACCCAG                             | huTRBV10-<br>2ext      | CGATTTTCTGCAGAGACG<br>C                         | huTRAV8-<br>7int     | GAAAGAACTGCACTCTTCA<br>ATG                        | huTRBV10-<br>3int      | CYACTCTGARGATCCAGC<br>C                               |
| huTRAV9-<br>1_2ext   | TGGTATGTCCAATATCCTG<br>G                       | huTRBV11ext            | ARGTGACAGARATGGGAC<br>AA                        | huTRAV9-<br>1_2int   | AAGATGGAAGGTTTACAGC<br>AC                         | huTRBV11int            | CATTCTGAACTGAACATG<br>AGC                             |
| huTRAV10<br>ext      | CAAGTGGAGCAGAGTCCT<br>C                        | huTRBV12ext            | AGCGATAAAGGAAGCATC<br>C                         | huTRAV10i<br>nt      | TCAGACAGTGCCTCAAAC<br>AC                          | huTRBV12int            | ATTCTACTCTGAAGGTGC<br>AGC                             |
| huTRAV12-<br>1_3ext  | CARTGTTCCAGAGGGAGC                             | huTRBV13ext            | CCAACAATCGATTCTTAGC<br>TG                       | huTRAV10i<br>-1_3int | AC                                                | huTRBV13int            | ATAACTCCAATCCAGGA<br>GG                               |
| huTRAV13-<br>1ext    | CATCCTTCAACCCTGAGTG<br>CAGCGCCTCAGACTACTT<br>C | huTRBV14ext            | AGTGACCCTGAGTTGTTCT<br>C                        | huTRAV13<br>-1int    | AC                                                | huTRBV14int            | CTGTAGCCTTGAGATCCA<br>GG                              |
| huTRAV13-<br>2ext    | AAGATAACTCAAACCCAAC<br>CAG                     | huTRBV15ext            | GTCTTTGATGAAACAGGTA<br>TGC                      | huTRAV13<br>-2int    | CAGTGAACATCTCTCTCTG<br>C                          | huTRBV15int            | TGTTCACTGGTACCGACA<br>G                               |
| huTRAV14<br>ext      | AGTGGAGCTGAAGTGCAA<br>C                        | huTRBV16ext            | CAGACCCCCAGACACAAG<br>CATAGATGAGTCAGGAAT<br>GCC | huTRAV14i<br>nt      | CCACCATGAACTGCAGTTA<br>C                          | huTRBV16int            | CGATTTTCTGCTGAATTT<br>C                               |
| huTRAV16<br>ext      | GGAGAAGAGGATCCTCAG<br>G                        | huTRBV17ext            | AGTTGTGAACAGAATTTGA<br>ACC                      | huTRAV16i<br>nt      | TGACAGTTCCTTCCACCTG                               | huTRBV17int            | TTCCTCTCACTGTGACAT<br>CG                              |
| huTRAV17<br>ext      | TCCAGTATCTAAACAAAGA<br>GCC                     | huTRBV18ext            | AAGTTTCTCATCAACCATG<br>C                        | huTRAV17i<br>nt      | TGTGACCTTGGACTGTGTG                               | huTRBV18int            | ACTCTGACAGTGACCAGT<br>GC                              |
| huTRAV18<br>ext      | AGGTAACCTCAAGCGCAGA<br>C                       | huTRBV19ext            |                                                 | huTRAV18i<br>nt      |                                                   | huTRBV19int            |                                                       |
| huTRAV19<br>ext      |                                                | huTRBV20ext            |                                                 | huTRAV19i<br>nt      |                                                   | huTRBV20int            |                                                       |

|               |                       |             |                     |               |                       |             |                    |
|---------------|-----------------------|-------------|---------------------|---------------|-----------------------|-------------|--------------------|
| huTRAV20      | CACAGTCAGCGGTTTAAAG   | huTRBV23ext | GCGATTCTCATCTCAATGC | huTRAV20i     | TCTGGTATAGGCAAGATCC   | huTRBV23int | GCAATCCTGTCTCAGAA  |
| ext           | AG                    |             | CCTACGGTTGATCTATTAC | nt            | TG                    |             | C                  |
| huTRAV21      |                       | huTRBV24ext | TCC                 | huTRAV21i     | AAC TTGGTTCTCAACTGCA  | huTRBV24int | GATGGATACAGTGCTCT  |
| ext           | TTCCTGCAGCTCTGAGTG    |             | ACTACACCTCATCCACTAT | nt            | G                     |             | CGA                |
| huTRAV22      | GTCCTCCAGACCTGATTCT   | huTRBV25ext | TCC                 | huTRAV22i     | CTGACTCTGTGAACAATTTG  | huTRBV25int | CAGAGAAGGGAGATCTTT |
| ext           | C                     | huTRBV27,28 | TGGTATCGACAAGACCCA  | nt            | C                     | huTRBV27,28 | CC                 |
| huTRAV23      |                       | ext         | G                   | huTRAV23i     | TGCATTATTGATAGCCATAC  | int         | TTCYCCCTGATYCTGGAG |
| ext           | TGCTTATGAGAACACTGCG   |             | TTCTGGTACCGTCAGCAA  | nt            | G                     |             | TC                 |
| huTRAV24      | CTCAGTCACTGCATGTTCA   | huTRBV29ext | C                   | huTRAV24i     | TGCCTTACACTGGTACAGA   | huTRBV29int | TCTGACTGTGAGCAACAT |
| ext           | G                     |             | TCCAGCTGCTCTTCTACTC | nt            | TG                    |             | GAG                |
| huTRAV25      | GGACTTCACCACGTA CTG   | huTRBV30ext | C                   | huTRAV25i     | TATAAGCAAAGGCCTGGTG   | huTRBV30int | AGAATCTCTCAGCCTCCA |
| ext           | C                     |             | TAGAACTGGACTTGACAG  | nt            |                       |             | GAC                |
| huTRAV26-1ext | GCAAACCTGCCTTGTAA TC  | huTRBCext   | CG                  | huTRAV26-1int | CGACAGATTCCTCCAG      | huTRBCint   | TTCTGATGGCTCAAACAC |
| huTRAV26-2ext | AGCCAAATTC AATGGAGA   |             |                     | huTRAV26-2int |                       |             | AG                 |
| huTRAV27      |                       |             |                     | nt            | TTCACTTGCCTTGTAAACCAC |             |                    |
| ext           | TCAGTTTCTAAGCATCCAA   |             |                     | huTRAV27i     | CTCACTGTGTACTGCAACT   |             |                    |
| huTRAV29      | GCAAGTTAAGCAA AATTC A |             |                     | nt            | CC                    |             |                    |
| ext           | CC                    |             |                     | huTRAV29i     | CTGCTGAAGGTCTACATT    |             |                    |
| huTRAV30      | CAACAACCAGTGCAGAGT    |             |                     | nt            | C                     |             |                    |
| ext           | C                     |             |                     | huTRAV30i     |                       |             |                    |
| huTRAV34      | AGAACTGGAGCAGAGTCC    |             |                     | nt            | AGAAGCATGGTGAAGCAC    |             |                    |
| ext           | TC                    |             |                     | huTRAV34i     | ATCTCACCATAAACTGCAC   |             |                    |
| huTRAV35      | GGTCAACAGCTGAATCAG    |             |                     | nt            | G                     |             |                    |
| ext           | AG                    |             |                     | huTRAV35i     |                       |             |                    |
| huTRAV36      | GAAGACAAGGTGGTACAA    |             |                     | nt            | ACCTGGCTATGGTACAAGC   |             |                    |
| ext           | AGC                   |             |                     | huTRAV36i     |                       |             |                    |
| huTRAV38      | GCACATATGACACCAGTG    |             |                     | nt            | ATCTCTGGTTGTCCACGAG   |             |                    |
| ext           | AG                    |             |                     | huTRAV38i     |                       |             |                    |
| huTRAV39      |                       |             |                     | nt            | CAGCAGGCAGATGATTCTC   |             |                    |
| ext           | CTGTTCCCTGAGCATGCAG   |             |                     | huTRAV39i     | TCAACCACTTCAGACAGAC   |             |                    |
| huTRAV40      | GCATCTGTGACTATGAACT   |             |                     | nt            | TG                    |             |                    |
| ext           | GC                    |             |                     | huTRAV40i     | GGAGGCGGAAATATTAAG    |             |                    |
| huTRAV41      | AATGAAGTGGAGCAGAGT    |             |                     | nt            | AC                    |             |                    |
| ext           | CC                    |             |                     | huTRAV41i     | TTGTTTATGCTGAGCTCAG   |             |                    |
|               | GACCAGCTTGACATCACA    |             |                     | nt            | G                     |             |                    |
| huTRACext     | G                     |             |                     | huTRACint     | TGTTGCTCTTGAAGTCCATA  |             |                    |
|               |                       |             |                     |               | G                     |             |                    |

---
